# Supplementary material for: Clonal Expansion Analysis of Transposon Insertions by High-Throughput Sequencing Identifies Candidate Cancer Genes in a PiggyBac Mutagenesis Screen
Source: PubMed Central journal article supplement (PMC3733837; doi:10.1371/journal.pone.0072338), 2013-08-05

**A**

|                            |            |       |
|----------------------------|------------|-------|
| Animal ID #4180            |            |       |
| R26-PBase; ATP1-S2; INK+/- |            |       |
| Age: 42 weeks              |            |       |
|                            | Insertions | Reads |
| Lung tumor, A              | 1327       | 16314 |
| Lung, adjacent             | 2998       | 28685 |
| Liver                      | 4262       | 50388 |
| Tail                       | 4675       | 54957 |

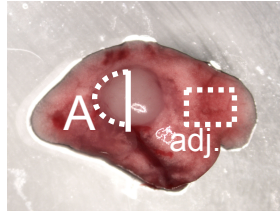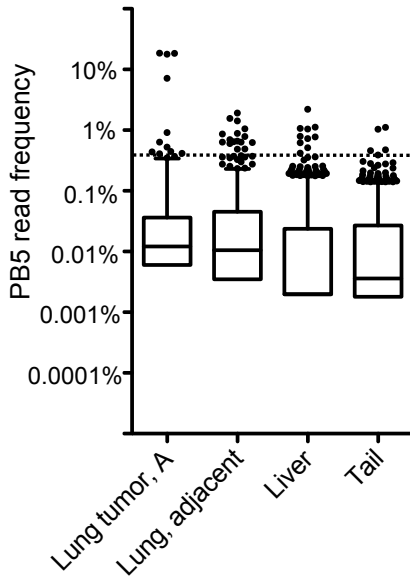

**Expanded insertions into genes**

| #4180 Lung tumor, A |       | #4180 Lung, adjacent |       | #4180 Liver   |       | #4180 Tail      |       |
|---------------------|-------|----------------------|-------|---------------|-------|-----------------|-------|
| Gene                | PB5 f | Gene                 | PB5 f | Gene          | PB5 f | Gene            | PB5 f |
| <i>Myo1d</i>        | 18.6% | <i>Myo1d</i>         | 1.9%  | <i>Myo1d</i>  | 1.1%  | <i>Myo1d</i>    | 1.1%  |
| <i>Rasgrf1</i>      | 18.4% | <i>Gstt1</i>         | 1.6%  | <i>Spice1</i> | 0.8%  | <i>Ano3</i>     | 1.0%  |
| <i>Nkain2</i>       | 0.5%  | <i>Reep3</i>         | 1.4%  | <i>Gstt1</i>  | 0.8%  | <i>1700020G</i> | 0.4%  |
| <i>Reep3</i>        | 0.4%  | <i>Pcolce2</i>       | 1.0%  |               |       | <i>Nuggc</i>    | 0.3%  |
| <i>Syn3</i>         | 0.4%  | <i>Pde11a</i>        | 0.7%  |               |       | <i>Zbtb16</i>   | 0.3%  |
| <i>Zfp462</i>       | 0.4%  | <i>Kif12</i>         | 0.7%  |               |       |                 |       |
|                     |       | <i>Syn3</i>          | 0.6%  |               |       |                 |       |
|                     |       | <i>Rgs6</i>          | 0.5%  |               |       |                 |       |
|                     |       | <i>Ablim1</i>        | 0.5%  |               |       |                 |       |
|                     |       | <i>Hs3st5</i>        | 0.4%  |               |       |                 |       |
|                     |       | <i>Pcyt1b</i>        | 0.4%  |               |       |                 |       |

**B**

|                    |            |           |
|--------------------|------------|-----------|
| Animal ID #3805    |            |           |
| R26-PBase; ATP1-S2 |            |           |
| Age: 58 weeks      |            |           |
|                    | Insertions | PB5 Reads |
| Heart              | 3378       | 25599     |
| Kidney             | 7680       | 143862    |
| Liver              | 8690       | 131204    |
| Lung               | 3507       | 39058     |
| Spleen             | 4379       | 58661     |
| Tail               | 4145       | 25855     |

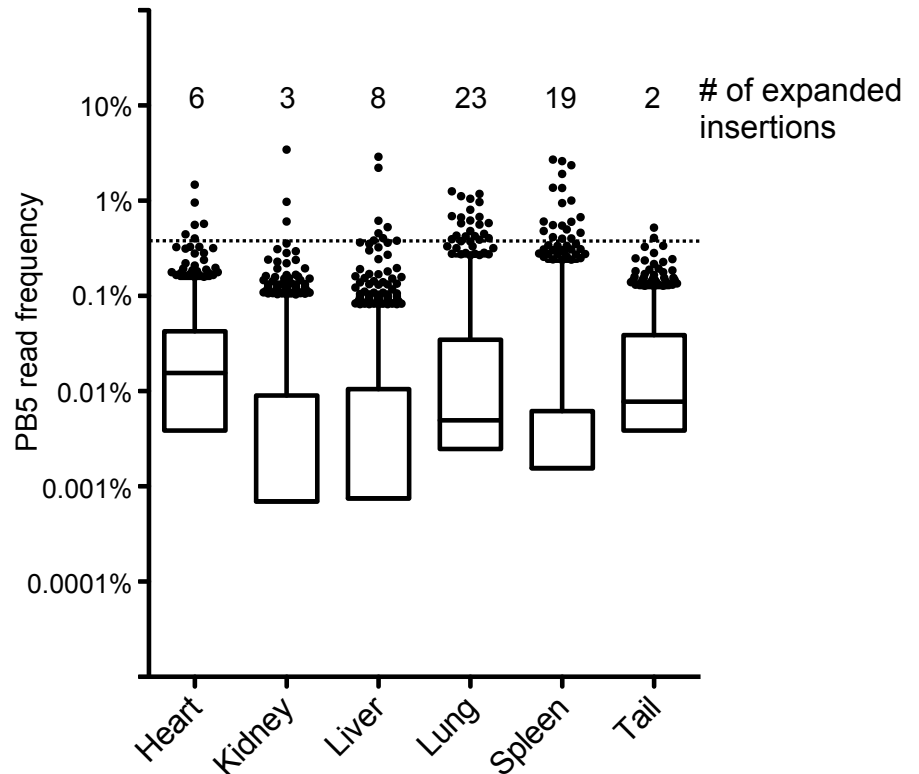

Supplement: pone.0072338.s007.pdf [file pone.0072338.s007.pdf]
