# Supplementary material for: Clonal Expansion Analysis of Transposon Insertions by High-Throughput Sequencing Identifies Candidate Cancer Genes in a PiggyBac Mutagenesis Screen
Source: PubMed Central journal article supplement (PMC3733837; doi:10.1371/journal.pone.0072338), 2013-08-05
Supplement: pone.0072338.s001.pdf [file pone.0072338.s001.pdf]

**A**

| Animal ID | Age    | Tumor sites   | Tumor # | Tail control |
|-----------|--------|---------------|---------|--------------|
| #1267     | 59 wks | liver, spleen | 05, 09  | tail 01      |
| #1221     | 63 wks | lung          | 06      | tail 02      |
| #1225     | 63 wks | skin          | 03      | tail 03      |
| #1222     | 67 wks | intestines    | 11      |              |
| #1081     | 72 wks | lung          | 07      |              |
| #1218     | 76 wks | oral          | 02      | tail 04      |
| #839      | 79 wks | oral, lung    | 01, 08  | tail 05      |
| #1157     | 85 wks | skin, spleen  | 04, 10  | tail 06      |

**B**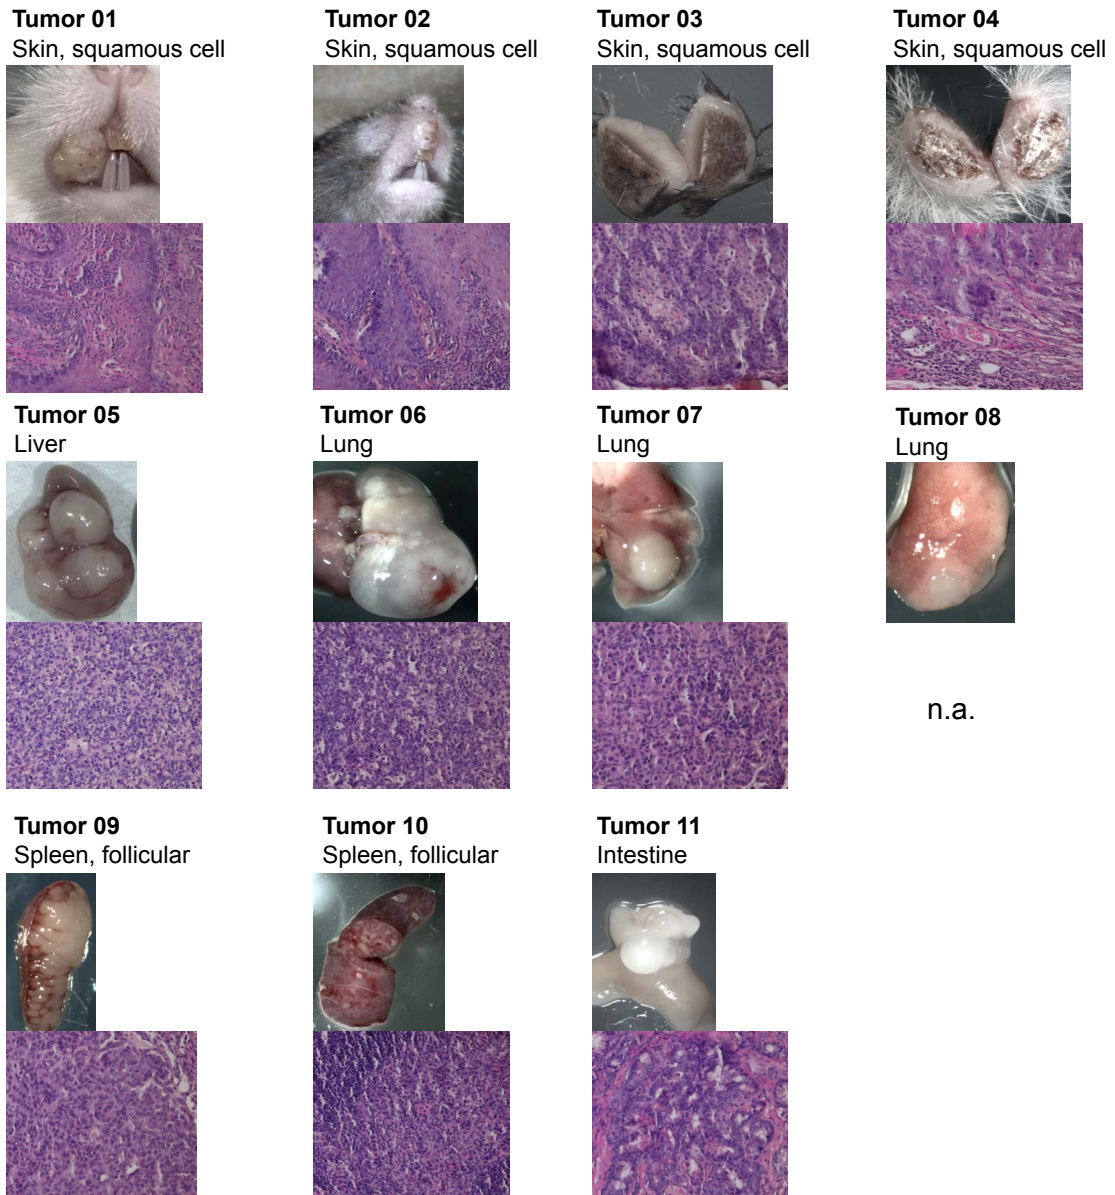**C**

| Tumor# | location  | tumor% | comments                                                                              |
|--------|-----------|--------|---------------------------------------------------------------------------------------|
| 01     | skin      | 95     | SCC with 5% stroma                                                                    |
| 02     | skin      | 90     | SCC with 10% stroma                                                                   |
| 03     | skin      | 85     | SCC with 15% stroma                                                                   |
| 04     | skin      | 30     | SCC with 60% keratin,10% stroma                                                       |
| 05     | liver     | 100    | tumor cells similar as tumor# 9                                                       |
| 06     | lung      | 75     | adenocarcinoma like tumor with 25% adjacent normal lung                               |
| 07     | lung      | 85     | adenocarcinoma like tumor with 15% adjacent normal lung                               |
| 08     | lung      | n.a.   | no tumor tissue for histology available                                               |
| 09     | spleen    | 100    | tumor cells similar as tumor# 5                                                       |
| 10     | spleen    | 100    | lymphoma?                                                                             |
| 11     | intestine | 60     | adenocarcinoma like tumor with 5% adjacent normal mucosa, 20% stroma, 15% cyst. gland |
