# Supplementary material for: Clonal Expansion Analysis of Transposon Insertions by High-Throughput Sequencing Identifies Candidate Cancer Genes in a PiggyBac Mutagenesis Screen
Source: PubMed Central journal article supplement (PMC3733837; doi:10.1371/journal.pone.0072338), 2013-08-05

**A**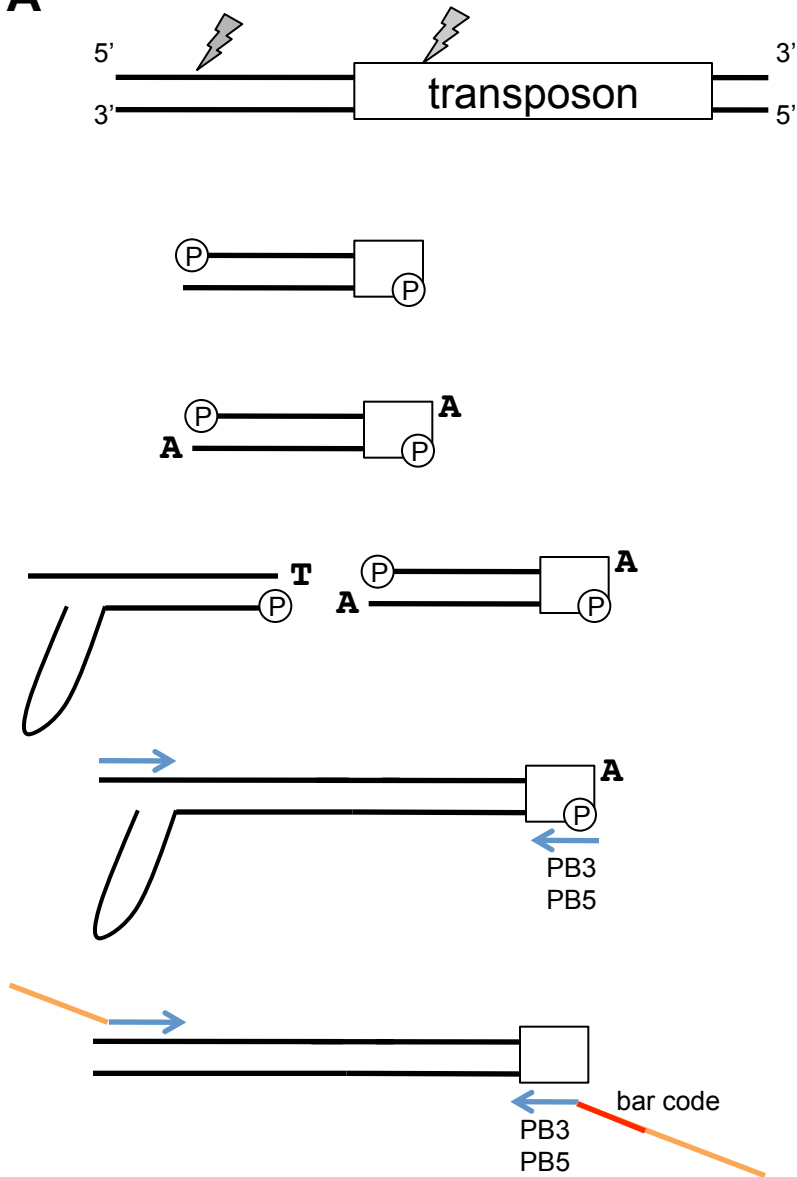

1. Random fragmentation by acoustic shearing

2. End repair with Klenow and T4 DNA Polymerase, and 5' phosphorylation with PNK

3. 3' A-tailing with Taq polymerase

4. Ligation of Splinkerette linker (3' T overhang and 5'-phosphate)

5. PCR with Splinkerette primer and transposon primer (PB3 or PB5 side)

6. Nested PCR with primers containing Illumina adapters and barcode (BC01 – BC17)

**B**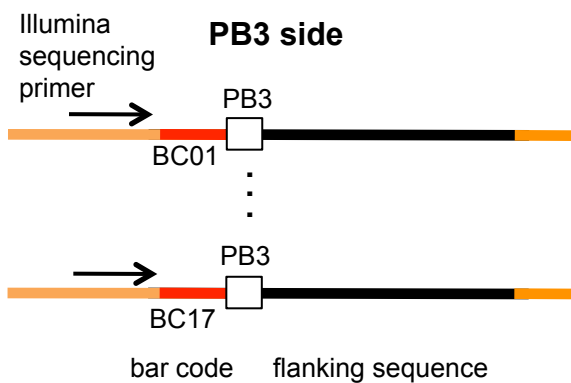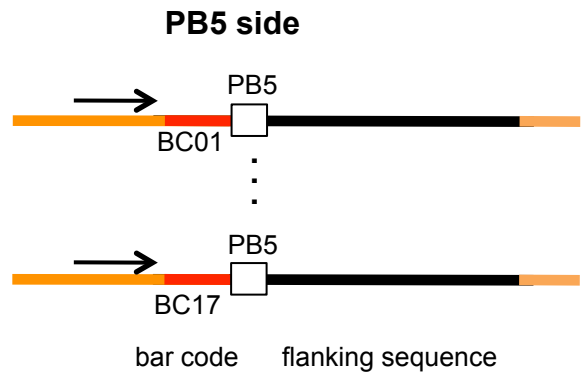

Supplement: pone.0072338.s002.pdf [file pone.0072338.s002.pdf]
