# Supplementary material for: Clonal Expansion Analysis of Transposon Insertions by High-Throughput Sequencing Identifies Candidate Cancer Genes in a PiggyBac Mutagenesis Screen
Source: PubMed Central journal article supplement (PMC3733837; doi:10.1371/journal.pone.0072338), 2013-08-05

**A**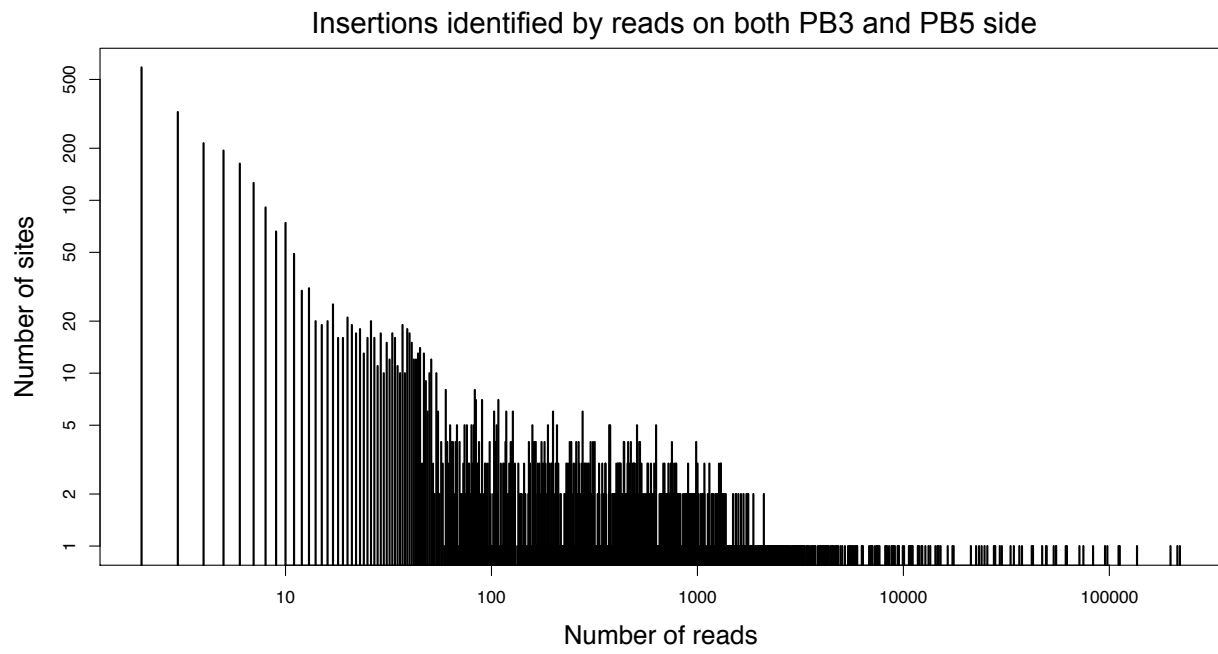**B**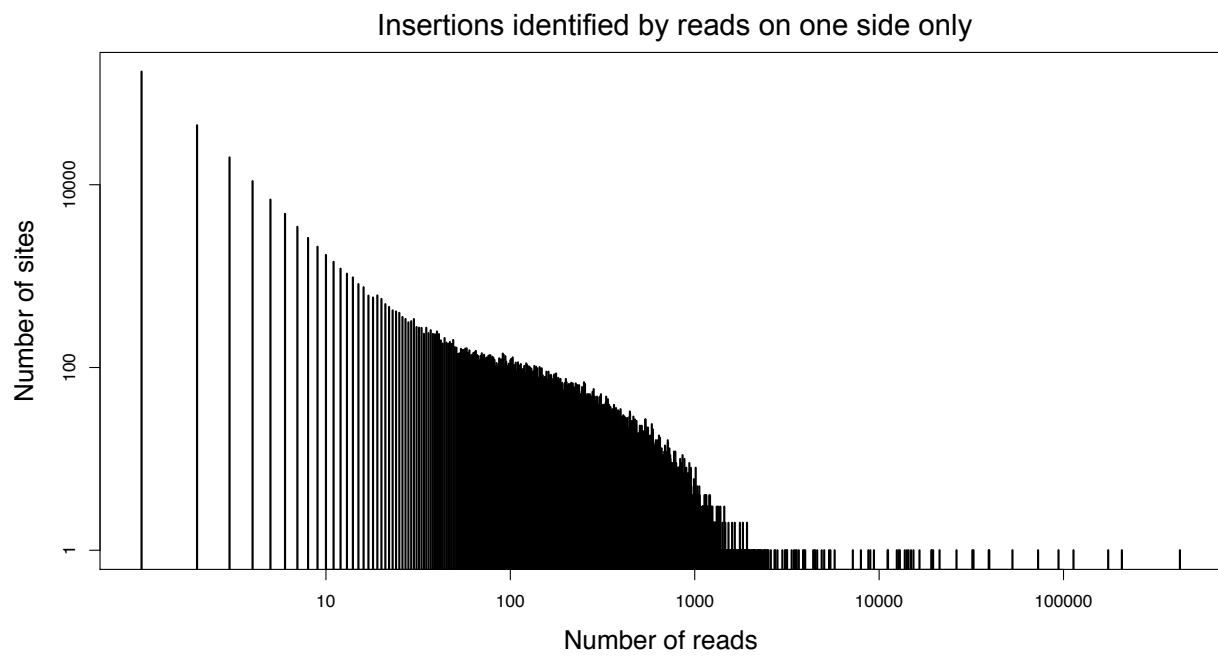

Supplement: pone.0072338.s004.pdf [file pone.0072338.s004.pdf]
