# Supplementary material for: Clonal Expansion Analysis of Transposon Insertions by High-Throughput Sequencing Identifies Candidate Cancer Genes in a PiggyBac Mutagenesis Screen
Source: PubMed Central journal article supplement (PMC3733837; doi:10.1371/journal.pone.0072338), 2013-08-05
Supplement: pone.0072338.s006.pdf [file pone.0072338.s006.pdf]

**A**

|                                          |            |           |
|------------------------------------------|------------|-----------|
| Tumor 05, liver<br>Formalin fixed tissue |            |           |
|                                          | Insertions | PB5 Reads |
| Tumor 05, A                              | 1857       | 90406     |
| Tumor 05, B                              | 1902       | 50160     |

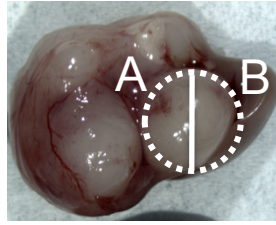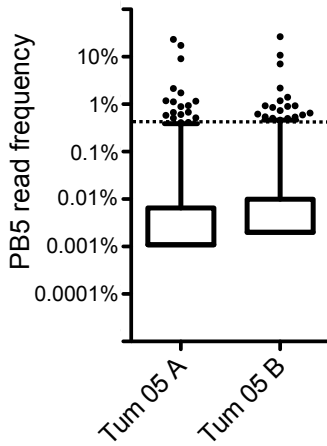

**Tumor 05 A**

| Chr   | Position  | PB5 f |                |
|-------|-----------|-------|----------------|
| chr11 | 41573884  | 23.2% | intergenic     |
| chr18 | 16209166  | 17.4% | intergenic     |
| chr1  | 87855454  | 9.1%  | <i>Dgkd</i>    |
| chr8  | 38677940  | 2.2%  | intergenic     |
| chr19 | 34319719  | 1.7%  | <i>Fas</i>     |
| chr19 | 32786662  | 1.2%  | <i>Pten</i>    |
| chr8  | 100880553 | 1.2%  | intergenic     |
| chr13 | 69768968  | 1.1%  | intergenic     |
| chr6  | 120080572 | 0.9%  | intergenic     |
| chr1  | 156608148 | 0.9%  | <i>Abl2</i>    |
| chr3  | 100720626 | 0.7%  | intergenic     |
| chr9  | 114777333 | 0.7%  | <i>Cmtm7</i>   |
| chr1  | 181237712 | 0.6%  | intergenic     |
| chr16 | 23230498  | 0.6%  | <i>St6gal1</i> |
| chr1  | 134962318 | 0.5%  | intergenic     |
| chr6  | 131293588 | 0.5%  | <i>Magohb</i>  |
| chr13 | 32829461  | 0.4%  | intergenic     |
| chr2  | 158268767 | 0.4%  | <i>Bpi1</i>    |
| chr9  | 98589940  | 0.4%  | <i>Mrps22</i>  |

**Tumor 05 B**

| Chr   | Position  | PB5 f |                      |
|-------|-----------|-------|----------------------|
| chr11 | 41573884  | 26.5% | intergenic           |
| chr18 | 16209166  | 10.7% | intergenic           |
| chr1  | 87855454  | 7.1%  | <i>Dgkd</i>          |
| chr8  | 38677940  | 2.2%  | intergenic           |
| chr19 | 34319719  | 1.4%  | <i>Fas</i>           |
| chr19 | 32786662  | 1.2%  | <i>Pten</i>          |
| chr1  | 156608148 | 0.9%  | <i>Abl2</i>          |
| chr1  | 97039868  | 0.9%  | intergenic           |
| chr6  | 120080572 | 0.9%  | intergenic           |
| chr9  | 114777333 | 0.9%  | <i>Cmtm7</i>         |
| chr11 | 22125225  | 0.7%  | <i>Ehbp1</i>         |
| chr9  | 63572479  | 0.7%  | <i>lqch</i>          |
| chr6  | 131293588 | 0.6%  | <i>Magohb</i>        |
| chr8  | 100880553 | 0.6%  | intergenic           |
| chr13 | 69768968  | 0.5%  | intergenic           |
| chr16 | 95849795  | 0.5%  | <i>1600002D24Rik</i> |
| chr9  | 5699470   | 0.5%  | intergenic           |
| chr9  | 98589940  | 0.5%  | <i>Mrps22</i>        |
| chr2  | 11637292  | 0.5%  | intergenic           |
| chr8  | 87954812  | 0.5%  | <i>Zfp423</i>        |
| chr3  | 100720626 | 0.4%  | intergenic           |
| chr8  | 28543227  | 0.4%  | intergenic           |
| chr12 | 53713078  | 0.4%  | <i>Npas3</i>         |
| chr15 | 39478446  | 0.4%  | <i>Rims2</i>         |

**B**

|                                                                |            |           |
|----------------------------------------------------------------|------------|-----------|
| Animal ID #4180<br>R26-PBase; ATP1-S2; INK+/-<br>Age: 42 weeks |            |           |
|                                                                | Insertions | PB5 Reads |
| Lung tumor, A                                                  | 1327       | 16314     |
| Lung tumor, B                                                  | 1109       | 11394     |

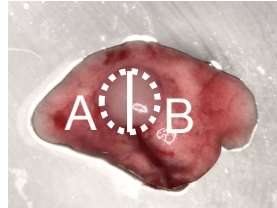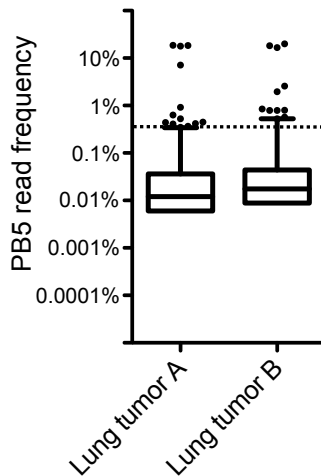

**Lung tumor A**

| Chr   | Position | PB5 f |                |
|-------|----------|-------|----------------|
| chr11 | 80623112 | 18.6% | <i>Myo1d</i>   |
| chr9  | 89968709 | 18.4% | <i>Rasgrf1</i> |
| chr12 | 69422766 | 17.8% | intergenic     |
| chr10 | 56904704 | 7.1%  | intergenic     |
| chr18 | 14015898 | 0.9%  | intergenic     |
| chr10 | 15213909 | 0.6%  | intergenic     |
| chr10 | 32264523 | 0.5%  | <i>Nkain2</i>  |
| chr10 | 67016841 | 0.4%  | <i>Reep3</i>   |
| chr10 | 86146164 | 0.4%  | <i>Syn3</i>    |
| chr6  | 17017596 | 0.4%  | intergenic     |
| chr4  | 54976180 | 0.4%  | <i>Zfp462</i>  |

**Lung tumor B**

| Chr   | Position  | PB5 f |                |
|-------|-----------|-------|----------------|
| chr12 | 69422766  | 19.9% | intergenic     |
| chr11 | 80623112  | 18.2% | <i>Myo1d</i>   |
| chr9  | 89968709  | 16.6% | <i>Rasgrf1</i> |
| chr10 | 56904704  | 2.6%  | intergenic     |
| chr7  | 143292394 | 2.0%  | <i>Kcnq1</i>   |
| chr2  | 52623038  | 0.8%  | <i>Cacnb4</i>  |
| chr18 | 14015898  | 0.8%  | intergenic     |
| chr10 | 15061726  | 0.8%  | intergenic     |
| chrX  | 89274343  | 0.8%  | intergenic     |
| chr10 | 86146164  | 0.6%  | <i>Syn3</i>    |
| chr2  | 76150368  | 0.5%  | <i>Pde11a</i>  |
| chr10 | 119901129 | 0.5%  | <i>Grip1</i>   |
| chr10 | 32264523  | 0.5%  | <i>Nkain2</i>  |
| chr10 | 67016841  | 0.5%  | <i>Reep3</i>   |
| chr2  | 49096760  | 0.4%  | <i>Mbd5</i>    |
| chr10 | 15091000  | 0.4%  | intergenic     |
