# Supplementary material for: Clonal Expansion Analysis of Transposon Insertions by High-Throughput Sequencing Identifies Candidate Cancer Genes in a PiggyBac Mutagenesis Screen
Source: PubMed Central journal article supplement (PMC3733837; doi:10.1371/journal.pone.0072338), 2013-08-05
Supplement: pone.0072338.s012.pdf [file pone.0072338.s012.pdf]

## Supplementary Methods

### Splinkerette with acoustic shearing for preparation of transposon insertion site libraries for Illumina sequencing

Genomic DNA was isolated from tumor samples by overnight digestion in lysis buffer (0.1 M Tris pH 8.5, 0.2 M NaCl, 5 mM EDTA, 0.2% SDS, 0.1 mg/ml Proteinase K) at 55°C, followed by 2-propanol precipitation, 70% ethanol wash, and resuspension overnight in TE buffer (10mM Tris, 1 mM EDTA, pH 7.4) at 55°C.

To shear DNA into fragments of 200 – 400 bp size, 3 µg of DNA in a volume of 120 µl TE were sonicated in a Covaris E210 acoustic focusing instrument (parameter settings: Time: 600 sec, Duty Cycle: 5%, Intensity: 2, Cycles per burst: 50). DNA was purified with a Qiaquick spin column (QIAGEN) and eluted in a volume of 30 µl EB buffer. For quality control, 5 µl of the eluted DNA was analyzed on a 0.8% agarose gel.

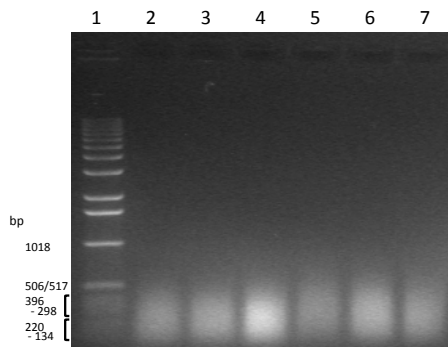

Example of sheared DNA separated on 0.8% agarose gel

Lane 1: 1 kb ladder, Invitrogen

Lane 2-7: DNA sheared with Covaris E210 sonicator

### DNA Fragment End repair

14.5 µl Qiaquick purified genomic DNA, sheared by Covaris sonication

2 µl 10x T4 DNA ligase buffer w/ 10 mM ATP (NEB)

1 µl dNTP (10 mM)

1 µl T4 DNA Polymerase

1 µl Klenow DNA Polymerase

0.5 µl T4 Polynucleotid kinase

---

20 µl

30 min incubation at RT

DNA was purified with a Qiaquick spin column and eluted in 42 µl EB.

### **A-tailing of DNA fragments**

42 µl Qiaquick purified end-repaired DNA  
1 µl dATP (10 mM)  
5 µl 10x PCR buffer ThermoPol (NEB)  
2 µl Taq  
---  
50 µl

15 min incubation at 72°C

The entire reaction was EtOH precipitated by using 2 µg Glycogen as carrier and resuspended in 7.5 µl H<sub>2</sub>O.

### **Preparing Splinkerette adaptor**

(final adaptor conc. 25 µM)

Mix:

25 µl Adaptor oligo "plus" strand (100 µM)  
25 µl Adaptor oligo "minus" strand (100 µM)  
20 µl NEB restriction buffer 2  
30 µl H<sub>2</sub>O

Boil for 2 min, let cool down at RT. Store at -20°C.

### **Ligation of Splinkerette adaptor**

7.5 µl A-tailed DNA fragments  
0.5 µl Adaptor SPLK-T (25 µM)  
1 µl 10x T4 Ligase buffer  
1 µl T4 Ligase  
--  
10 µl

Ligation was performed o/n at 16°C

The ligation was purified with a Qiaquick spin column and eluted in 40 µl EB.

### **First Splinkerette PCR**

2.5 µl Qiaquick purified ligation product

5 µl 5x Phusion HF buffer

0.5 µl dNTP (10 mM)

0.5 µl Sp-1 (10µM)

0.5 µl PB5-1 (10µM)

0.25 µl Phusion enzyme

15.75 µl H<sub>2</sub>O

----

25µl

3 min 95°C

35 cycles: 15 sec 95°C, 30 sec 65°C, 30 sec 72°C

### **Second Splinkerette PCR**

A 1:200 dilution of the first PCR was prepared with H<sub>2</sub>O

2.5µl 1:200 dilution of first PCR

5 µl 5x Phusion HF buffer

0.5 µl dNTP (10 mM)

0.5 µl P7-Sp-2 (10µM)

0.5 µl P5-XX-PB5-2 (10µM) (XX = barcode number)

0.25 µl Phusion enzyme

15.75 µl H<sub>2</sub>O

----

25µl

3 min 95°C

35 cycles: 15 sec 95°C, 30 sec 60°C, 30 sec 72°C

12.5 µl of the PCR product was separated on a 0.8% agarose gel

PCR product was cut out in a size range of 200 to 400 bp size, purified with a Qiaquick spin column and eluted in 30 µl EB.

DNA concentration was determined with a Nanodrop device. To reach a final concentration of the pooled sample of >30 ng/μl in 20 μl H<sub>2</sub>O, appropriate amounts of all samples were pooled together, EtOH precipitated, and resuspended in 20 μl H<sub>2</sub>O, and submitted to the sequencing facility at Mount Sinai School of Medicine. Samples were mixed with 50% PhiX Genomic DNA library (Illumina) to increase cluster diversity on the Illumina chip. Sample pools were sequenced on a single lane of an Illumina HiSeq 2000 Instrument as single unpaired reads with a length of 100 bases.

### Structure of final Splinkerette PCR product

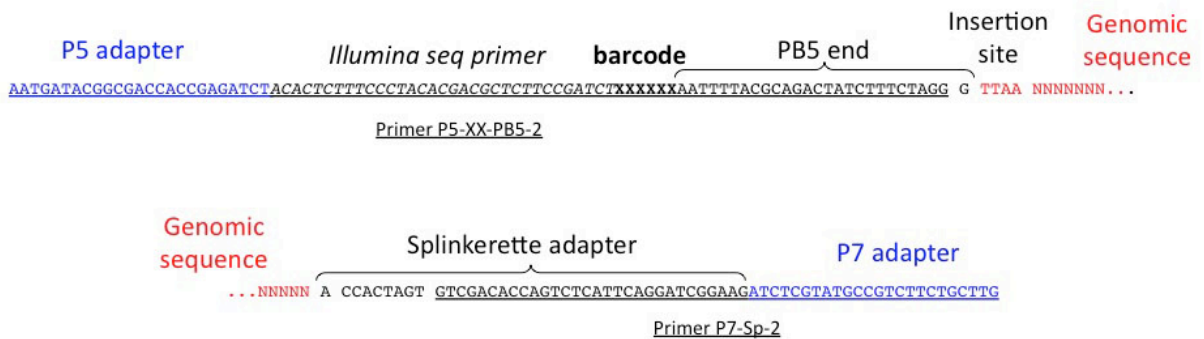

Structure of PB5 insertion site library is shown, PB3 library has same structure, except PB3 end part (see Oligonucleotide Sequences for details).

# Oligonucleotide Sequences

| Oligonucleotide sequences            |                                                                                              |                                                                                              |                                                                               |
|--------------------------------------|----------------------------------------------------------------------------------------------|----------------------------------------------------------------------------------------------|-------------------------------------------------------------------------------|
| Purpose                              | Name                                                                                         | Sequence 5' - 3'                                                                             | Description                                                                   |
| <b>Splinkerette linker</b>           | SpkTp                                                                                        | CGAAGAGTAACCGTTGCTAGGAGAGACCGTGGCTGAATGAGACTGGTGTGACACTAGTGG* <sup>T</sup>                   | Splinkerette T-overhang linker, plus strand (* = phosphorothioate bond)       |
|                                      | SpkTm                                                                                        | (5' phospho) CCACATAGTGTGCACACCAGTCTCAATTTTTTTTTTCAAAAAA                                     | Splinkerette T-overhang linker, minus strand                                  |
| <b>First round Splinkerette PCR</b>  | Sp-1                                                                                         | GAGTAACCGTTGCTAGGAGAG                                                                        | Primer on Splinkerette linker                                                 |
|                                      | PB3-1                                                                                        | CGCATGATTATCTTTAACGTACGTAC                                                                   | Primer on PB3 end                                                             |
|                                      | PB5-1                                                                                        | CAAGAATGCATGCGTCAATTTACGC                                                                    | Primer on PB5 end                                                             |
| <b>Second round Splinkerette PCR</b> | P7-Sp-2                                                                                      | CAAGCAGAAGACGGCATAACGAGATCTCCGATCTCTGAATGAGACTGGTGTGAC                                       | Illumina P7 adapter + primer on Splinkerette linker                           |
|                                      | P5-01-PB5-2                                                                                  | AATGATACGGCGACCACCGAGATCTACACTCTTCCCTACACGACGCTCTCCGATCTATCAGC<br>AATTTTACGCAGACTATCTTTCTAGG | Illumina P5 adapter + sequencing primer site + barcode 01 + primer on PB5 end |
|                                      | P5-02-PB5-2                                                                                  | AATGATACGGCGACCACCGAGATCTACACTCTTCCCTACACGACGCTCTCCGATCTCGATGT<br>AATTTTACGCAGACTATCTTTCTAGG | Illumina P5 adapter + sequencing primer site + barcode 02 + primer on PB5 end |
|                                      | P5-03-PB5-2                                                                                  | AATGATACGGCGACCACCGAGATCTACACTCTTCCCTACACGACGCTCTCCGATCTTTAGGC<br>AATTTTACGCAGACTATCTTTCTAGG | Illumina P5 adapter + sequencing primer site + barcode 03 + primer on PB5 end |
|                                      | P5-04-PB5-2                                                                                  | AATGATACGGCGACCACCGAGATCTACACTCTTCCCTACACGACGCTCTCCGATCTTGACCA<br>AATTTTACGCAGACTATCTTTCTAGG | Illumina P5 adapter + sequencing primer site + barcode 04 + primer on PB5 end |
|                                      | P5-05-PB5-2                                                                                  | AATGATACGGCGACCACCGAGATCTACACTCTTCCCTACACGACGCTCTCCGATCTGACAT<br>AATTTTACGCAGACTATCTTTCTAGG  | Illumina P5 adapter + sequencing primer site + barcode 05 + primer on PB5 end |
|                                      | P5-06-PB5-2                                                                                  | AATGATACGGCGACCACCGAGATCTACACTCTTCCCTACACGACGCTCTCCGATCTCAGATC<br>AATTTTACGCAGACTATCTTTCTAGG | Illumina P5 adapter + sequencing primer site + barcode 06 + primer on PB5 end |
|                                      | P5-07-PB5-2                                                                                  | AATGATACGGCGACCACCGAGATCTACACTCTTCCCTACACGACGCTCTCCGATCTACTTGA<br>AATTTTACGCAGACTATCTTTCTAGG | Illumina P5 adapter + sequencing primer site + barcode 07 + primer on PB5 end |
|                                      | P5-08-PB5-2                                                                                  | AATGATACGGCGACCACCGAGATCTACACTCTTCCCTACACGACGCTCTCCGATCTGATCAG<br>AATTTTACGCAGACTATCTTTCTAGG | Illumina P5 adapter + sequencing primer site + barcode 08 + primer on PB5 end |
|                                      | P5-09-PB5-2                                                                                  | AATGATACGGCGACCACCGAGATCTACACTCTTCCCTACACGACGCTCTCCGATCTTAGCTT<br>AATTTTACGCAGACTATCTTTCTAGG | Illumina P5 adapter + sequencing primer site + barcode 09 + primer on PB5 end |
|                                      | P5-10-PB5-2                                                                                  | AATGATACGGCGACCACCGAGATCTACACTCTTCCCTACACGACGCTCTCCGATCTGGCTAG<br>AATTTTACGCAGACTATCTTTCTAGG | Illumina P5 adapter + sequencing primer site + barcode 10 + primer on PB5 end |
|                                      | P5-11-PB5-2                                                                                  | AATGATACGGCGACCACCGAGATCTACACTCTTCCCTACACGACGCTCTCCGATCTCTTGTA<br>AATTTTACGCAGACTATCTTTCTAGG | Illumina P5 adapter + sequencing primer site + barcode 11 + primer on PB5 end |
|                                      | P5-12-PB5-2                                                                                  | AATGATACGGCGACCACCGAGATCTACACTCTTCCCTACACGACGCTCTCCGATCTCGTGT<br>AATTTTACGCAGACTATCTTTCTAGG  | Illumina P5 adapter + sequencing primer site + barcode 12 + primer on PB5 end |
|                                      | P5-13-PB5-2                                                                                  | AATGATACGGCGACCACCGAGATCTACACTCTTCCCTACACGACGCTCTCCGATCTCGATG<br>AATTTTACGCAGACTATCTTTCTAGG  | Illumina P5 adapter + sequencing primer site + barcode 13 + primer on PB5 end |
|                                      | P5-14-PB5-2                                                                                  | AATGATACGGCGACCACCGAGATCTACACTCTTCCCTACACGACGCTCTCCGATCTACATCG<br>AATTTTACGCAGACTATCTTTCTAGG | Illumina P5 adapter + sequencing primer site + barcode 14 + primer on PB5 end |
|                                      | P5-15-PB5-2                                                                                  | AATGATACGGCGACCACCGAGATCTACACTCTTCCCTACACGACGCTCTCCGATCTGCCTAA<br>AATTTTACGCAGACTATCTTTCTAGG | Illumina P5 adapter + sequencing primer site + barcode 15 + primer on PB5 end |
|                                      | P5-16-PB5-2                                                                                  | AATGATACGGCGACCACCGAGATCTACACTCTTCCCTACACGACGCTCTCCGATCTTGGTCA<br>AATTTTACGCAGACTATCTTTCTAGG | Illumina P5 adapter + sequencing primer site + barcode 16 + primer on PB5 end |
|                                      | P5-17-PB5-2                                                                                  | AATGATACGGCGACCACCGAGATCTACACTCTTCCCTACACGACGCTCTCCGATCTCACTGT<br>AATTTTACGCAGACTATCTTTCTAGG | Illumina P5 adapter + sequencing primer site + barcode 17 + primer on PB5 end |
|                                      | P5-01-PB3-2                                                                                  | AATGATACGGCGACCACCGAGATCTACACTCTTCCCTACACGACGCTCTCCGATCTATCAGC<br>CGTCACAATATGATTATCTTTCTAGG | Illumina P5 adapter + sequencing primer site + barcode 01 + primer on PB3 end |
|                                      | P5-02-PB3-2                                                                                  | AATGATACGGCGACCACCGAGATCTACACTCTTCCCTACACGACGCTCTCCGATCTCGATGT<br>CGTCACAATATGATTATCTTTCTAGG | Illumina P5 adapter + sequencing primer site + barcode 02 + primer on PB3 end |
|                                      | P5-03-PB3-2                                                                                  | AATGATACGGCGACCACCGAGATCTACACTCTTCCCTACACGACGCTCTCCGATCTTTAGGC<br>CGTCACAATATGATTATCTTTCTAGG | Illumina P5 adapter + sequencing primer site + barcode 03 + primer on PB3 end |
|                                      | P5-04-PB3-2                                                                                  | AATGATACGGCGACCACCGAGATCTACACTCTTCCCTACACGACGCTCTCCGATCTTGACCA<br>CGTCACAATATGATTATCTTTCTAGG | Illumina P5 adapter + sequencing primer site + barcode 04 + primer on PB3 end |
|                                      | P5-05-PB3-2                                                                                  | AATGATACGGCGACCACCGAGATCTACACTCTTCCCTACACGACGCTCTCCGATCTACATGT<br>CGTCACAATATGATTATCTTTCTAGG | Illumina P5 adapter + sequencing primer site + barcode 05 + primer on PB3 end |
|                                      | P5-06-PB3-2                                                                                  | AATGATACGGCGACCACCGAGATCTACACTCTTCCCTACACGACGCTCTCCGATCTGCCAAT<br>CGTCACAATATGATTATCTTTCTAGG | Illumina P5 adapter + sequencing primer site + barcode 06 + primer on PB3 end |
|                                      | P5-07-PB3-2                                                                                  | AATGATACGGCGACCACCGAGATCTACACTCTTCCCTACACGACGCTCTCCGATCTCAGATC<br>CGTCACAATATGATTATCTTTCTAGG | Illumina P5 adapter + sequencing primer site + barcode 07 + primer on PB3 end |
|                                      | P5-08-PB3-2                                                                                  | AATGATACGGCGACCACCGAGATCTACACTCTTCCCTACACGACGCTCTCCGATCTACTTGA<br>CGTCACAATATGATTATCTTTCTAGG | Illumina P5 adapter + sequencing primer site + barcode 08 + primer on PB3 end |
|                                      | P5-09-PB3-2                                                                                  | AATGATACGGCGACCACCGAGATCTACACTCTTCCCTACACGACGCTCTCCGATCTGATCAG<br>CGTCACAATATGATTATCTTTCTAGG | Illumina P5 adapter + sequencing primer site + barcode 09 + primer on PB3 end |
|                                      | P5-10-PB3-2                                                                                  | AATGATACGGCGACCACCGAGATCTACACTCTTCCCTACACGACGCTCTCCGATCTGGCTAG<br>CGTCACAATATGATTATCTTTCTAGG | Illumina P5 adapter + sequencing primer site + barcode 10 + primer on PB3 end |
|                                      | P5-11-PB3-2                                                                                  | AATGATACGGCGACCACCGAGATCTACACTCTTCCCTACACGACGCTCTCCGATCTCTTGTA<br>CGTCACAATATGATTATCTTTCTAGG | Illumina P5 adapter + sequencing primer site + barcode 11 + primer on PB3 end |
|                                      | P5-12-PB3-2                                                                                  | AATGATACGGCGACCACCGAGATCTACACTCTTCCCTACACGACGCTCTCCGATCTCGTGT<br>CGTCACAATATGATTATCTTTCTAGG  | Illumina P5 adapter + sequencing primer site + barcode 12 + primer on PB3 end |
|                                      | P5-13-PB3-2                                                                                  | AATGATACGGCGACCACCGAGATCTACACTCTTCCCTACACGACGCTCTCCGATCTACATCG<br>CGTCACAATATGATTATCTTTCTAGG | Illumina P5 adapter + sequencing primer site + barcode 13 + primer on PB3 end |
|                                      | P5-14-PB3-2                                                                                  | AATGATACGGCGACCACCGAGATCTACACTCTTCCCTACACGACGCTCTCCGATCTGCCTAA<br>CGTCACAATATGATTATCTTTCTAGG | Illumina P5 adapter + sequencing primer site + barcode 14 + primer on PB3 end |
|                                      | P5-15-PB3-2                                                                                  | AATGATACGGCGACCACCGAGATCTACACTCTTCCCTACACGACGCTCTCCGATCTTGGTCA<br>CGTCACAATATGATTATCTTTCTAGG | Illumina P5 adapter + sequencing primer site + barcode 15 + primer on PB3 end |
|                                      | P5-16-PB3-2                                                                                  | AATGATACGGCGACCACCGAGATCTACACTCTTCCCTACACGACGCTCTCCGATCTTAGCTT<br>CGTCACAATATGATTATCTTTCTAGG | Illumina P5 adapter + sequencing primer site + barcode 16 + primer on PB3 end |
| P5-17-PB3-2                          | AATGATACGGCGACCACCGAGATCTACACTCTTCCCTACACGACGCTCTCCGATCTCACTGT<br>CGTCACAATATGATTATCTTTCTAGG | Illumina P5 adapter + sequencing primer site + barcode 17 + primer on PB3 end                |                                                                               |
